# Supplementary material
Source: PubMed Central journal article supplement (PMC1934555)

## Supplemental data

# Src promotes estrogen dependent ER $\alpha$ proteolysis in human breast cancer

Isabel Chu, Angel Arnaout, Sophie Loiseau, Jun Sun, Arun Seth, Chris McMahon, Kathy Chun, Bryan Hennessy, Gordon Mills and Joyce Slingerland

## Supplemental Methods

### QPCR quantitation of ER $\alpha$ mRNA

The reactions contained ER $\alpha$ -specific exon 5 5'CTCCTAACTTGCTCTTGGACAG 3' and the exon 7 sequence 5'TCGGTTCCGC ATGATGAATC 3' primers, 200ng RNA template, 0.1U uracil DNA glycosylase (Epicentre), 10 $\mu$ l QuantiTect SYBR Green RT-PCR Master Mix (Qiagen Inc.), 0.2  $\mu$ l QuantiTect RT Mix (Qiagen Inc.) and 3.5mMl MgCl<sub>2</sub>. After incubation at 50°C for 20 minutes and initial activation at 95°C for 15 minutes, 45 cycles of 94°C for 15 seconds, 60°C for 20 seconds, 72°C for 10 seconds were carried out. A program for the melting curve analysis was set at 95°C with a slope of 20°C per sec, 68°C with a slope of 20°C per second, and 95°C with a slope of 0.1°C.

### QPCR quantitation of GREB1 and pS2 mRNA

PCR reactions were at 95°C 30 s, followed by 60°C 60 s for 40 cycles. The primers used to detect ER target genes GREB1 and pS2 are as the followings: GREB1 forward ATCAGCTGCTCGGACTTGCTG and GREB1 reverse TGAGCTCCGGTCCTGACAGATG; pS2 forward

GCGCCCTGGTCCTGGTGTCCAT and pS2 reverse  
GAAACCACAATTCTGTCTTTTAC. GAPDH was used as an internal control:  
forward primer GAAGGTGAAGGTCGGAGTC and reverse primer  
GAAGATGGTGATGGGATTTTC.

### **Supplemental Figure 1**

MEK and PI3K do not stimulate estrogen dependent ER degradation.

**A:** asynchronous MCF-7 cultures were treated with MEK inhibitor, UO126 for 48 hr prior to immunoblotting for ER and activated phosphorylated MAPK (MAPK-P).

**B:** serum and E-deprived MCF-7 were treated with E + 5% FBS with or without 10  $\mu$ M UO126 for 6 hr and ER levels assayed.

**C:** ER and activated PKB (P-PKB) in MCF-7 treated with PI3K inhibitor, LY294002 for 48 hr.

**D and E:** E and serum deprived MCF-7 cells were stimulated with E + 5%FBS or E + 5%FBS together with 8  $\mu$ M LY294002 for 6 and 18 hr followed by ER and PKB immunoblotting. Cell cycle analysis by flow cytometry at t=0 and 18 hr is shown.

**A**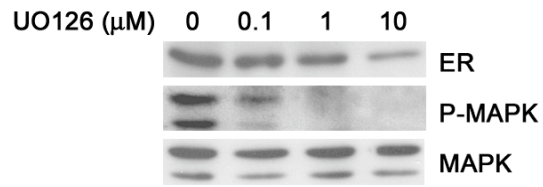**B**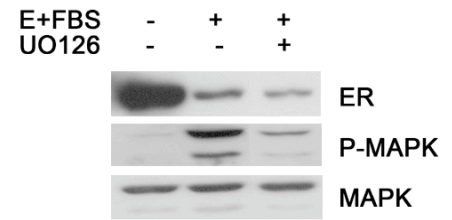**C**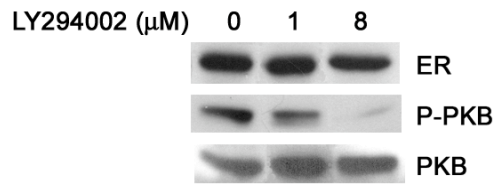**D**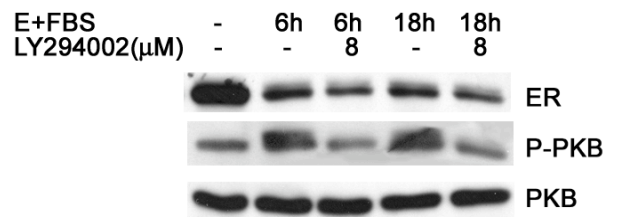**E**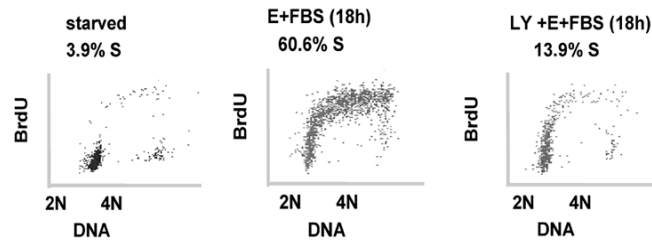

Supplement: JCI0721739sd.pdf [file JCI0721739sd.pdf]
